# Supplementary material for: A highly efficient 3D/0D CdIn2S4/Cu2O photoanode with a p–n type heterojunction for boosted photoelectrochemical water splitting under visible light irradiation
Source: Royal Society of Chemistry journal article supplement (doi:10.1039/d4tc04202f), 2024-12-04
Supplement: d4tc04202f1.pdf [file d4tc04202f1.pdf]

*Supplementary Information*

**Highly efficient 3D/0D CdIn<sub>2</sub>S<sub>4</sub>/Cu<sub>2</sub>O photoanode with p-n type heterojunction for boosted photoelectrochemical water splitting under visible light irradiation**

Qi Wang<sup>a, b</sup>, Chengwei Hu<sup>c, d, \*</sup>, Lanlan Zhang<sup>a, b</sup>, Yuanhu Lei<sup>a, b</sup>, Zonghan Hu<sup>a, b</sup>,

Zihang Wang<sup>a, b</sup>, Yupei Qiao<sup>a</sup>, Bing Lv<sup>a, b, \*</sup>

<sup>a</sup> School of Physics and Electronic Science, Guizhou Normal University, Guiyang 550025, China.

<sup>b</sup> Key Laboratory of Low Dimensional Condensed Matter Physics of Higher Educational Institution of Guizhou Province, Guizhou Normal University, Guiyang 550025, China.

<sup>c</sup> Collaborative Innovation Center of Extreme Optics, Shanxi University, 030006, China.

<sup>d</sup> State Key Laboratory of Quantum Optics Devices, Institute of Opto-Electronics, Shanxi University, Taiyuan 030006, China.

---

\* Corresponding authors.

mail addresses: lvbing@gznu.edu.cn (B. Lv) huchengweiozr@gmail.com (C. Hu)

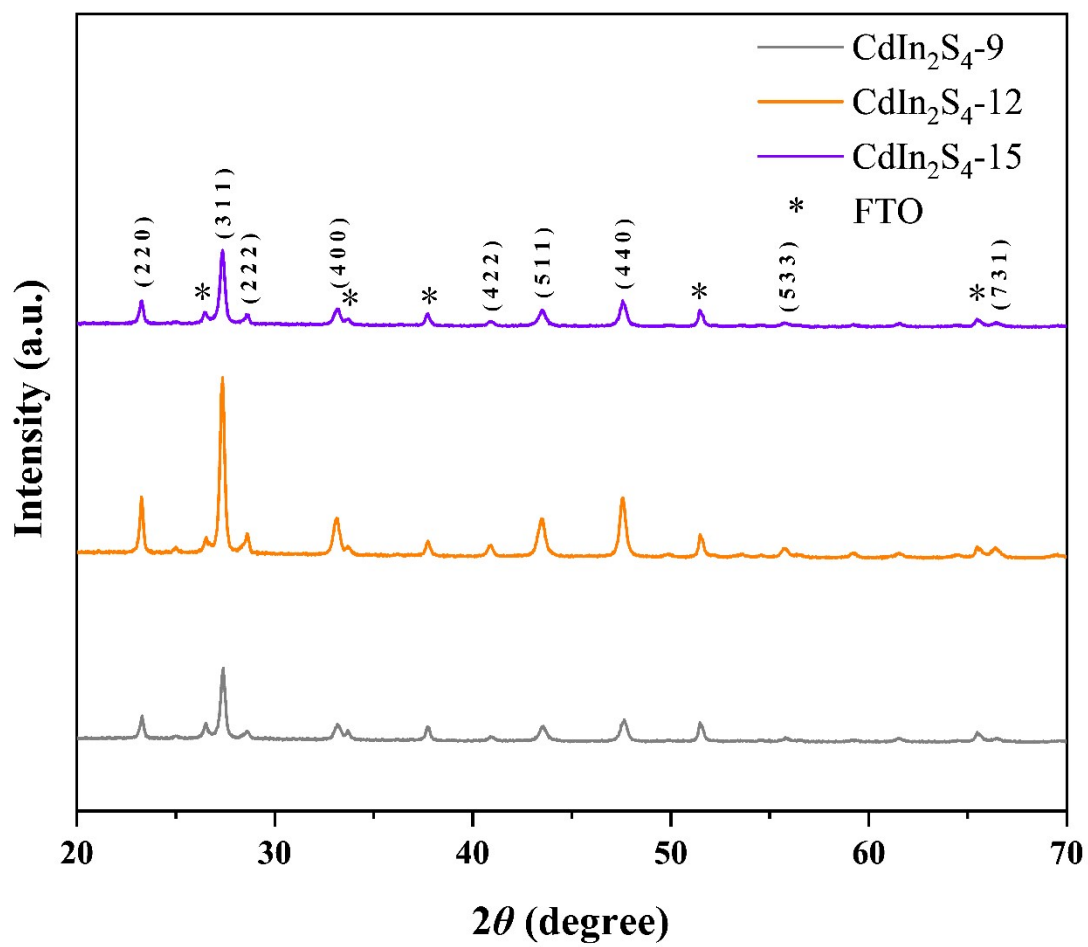

Fig. S1. The XRD patterns of CdIn<sub>2</sub>S<sub>4</sub>-9, CdIn<sub>2</sub>S<sub>4</sub>-12, CdIn<sub>2</sub>S<sub>4</sub>-15 nanofilms.

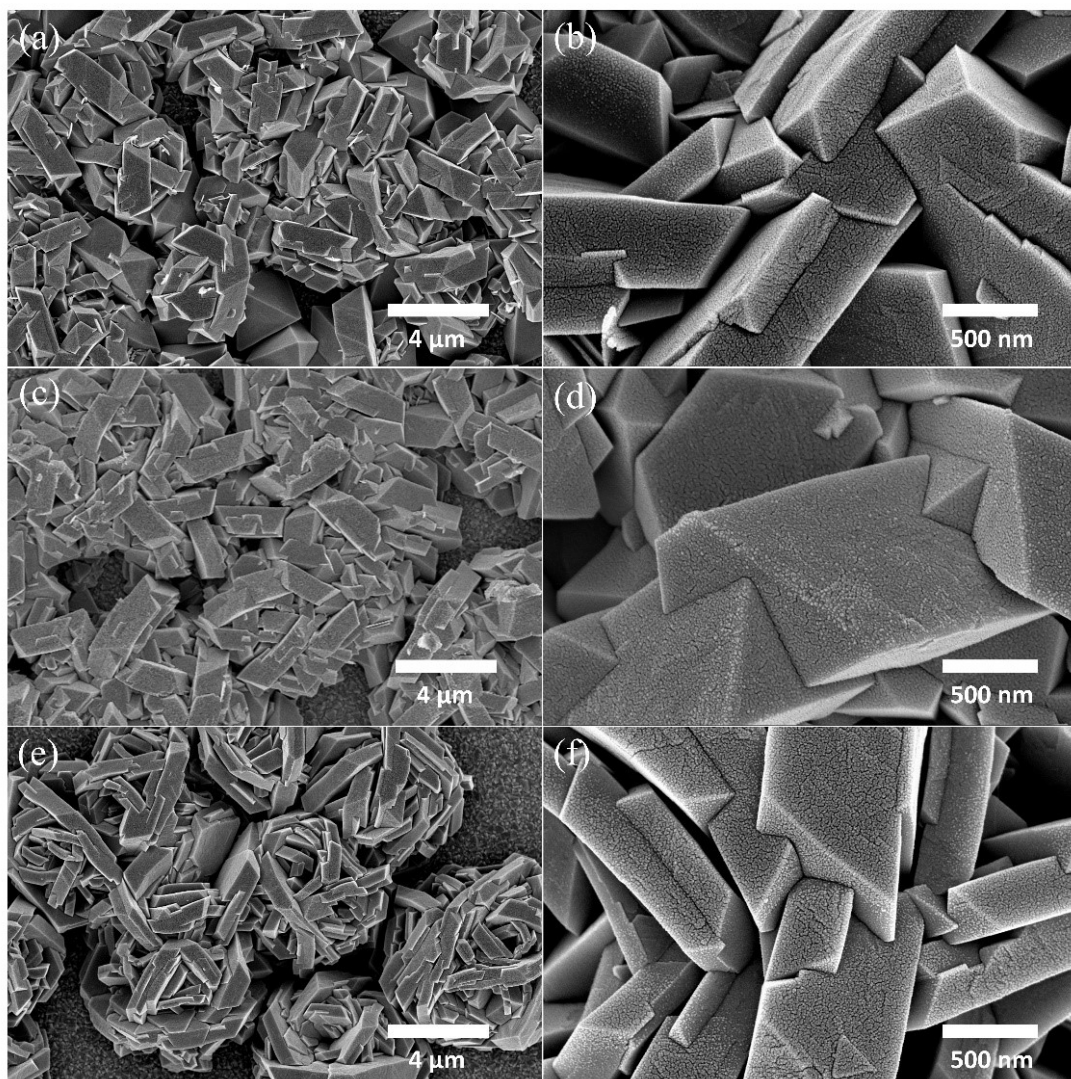

**Fig. S2.** (a,b) CdIn<sub>2</sub>S<sub>4</sub>-9, (c,d) CdIn<sub>2</sub>S<sub>4</sub>-12 and (e,f) CdIn<sub>2</sub>S<sub>4</sub>-15 Low magnification and high magnification SEM images of CdIn<sub>2</sub>S<sub>4</sub> nanofilm.

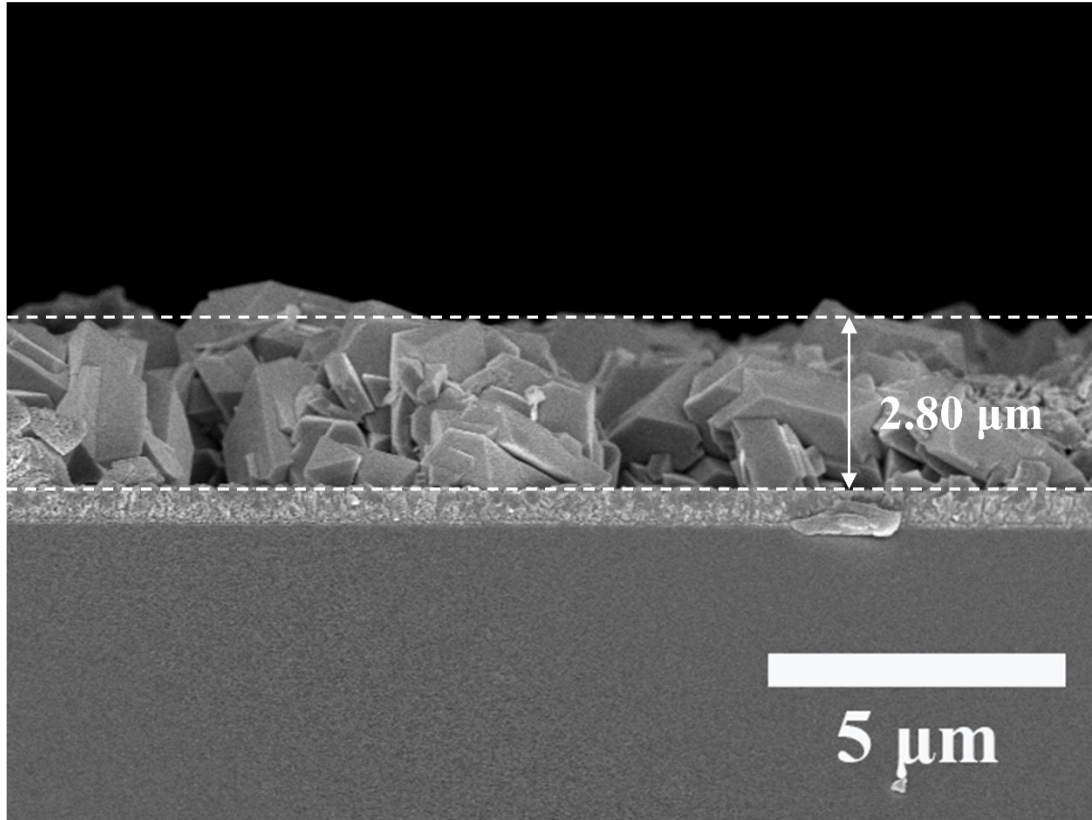

**Fig. S3.** The cross-section view of CdIn<sub>2</sub>S<sub>4</sub>/Cu<sub>2</sub>O heterojunction.

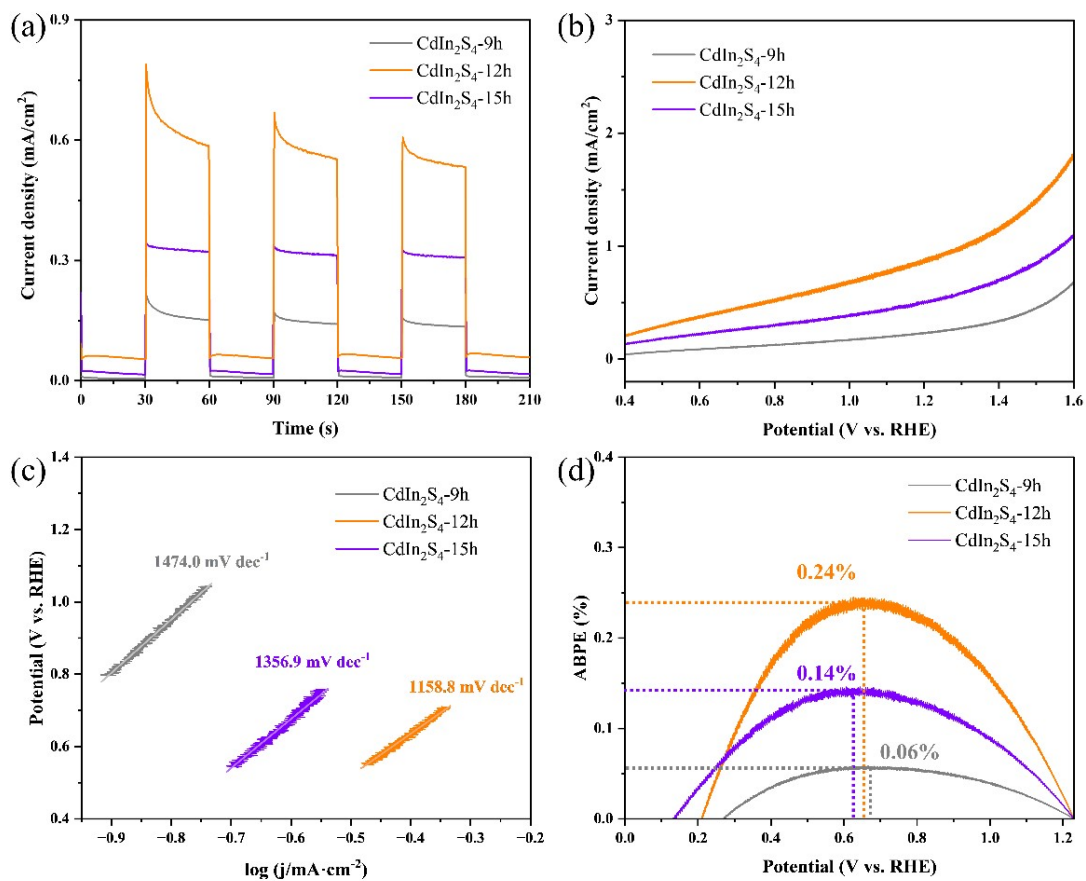

**Fig. S4.** (a) Transient photocurrent response (TPR), (b) Linear sweep voltammetry (LSV), (c) Tafel plots and (d) ABPE curves of CdIn<sub>2</sub>S<sub>4</sub>.

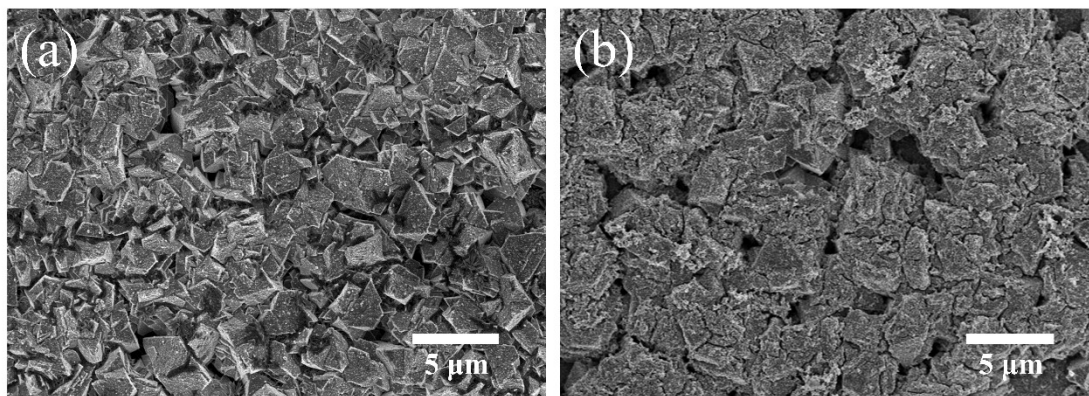

**Fig. S5.** SEM images of CdIn<sub>2</sub>S<sub>4</sub>/Cu<sub>2</sub>O: (a) before and (b) after the stability test.

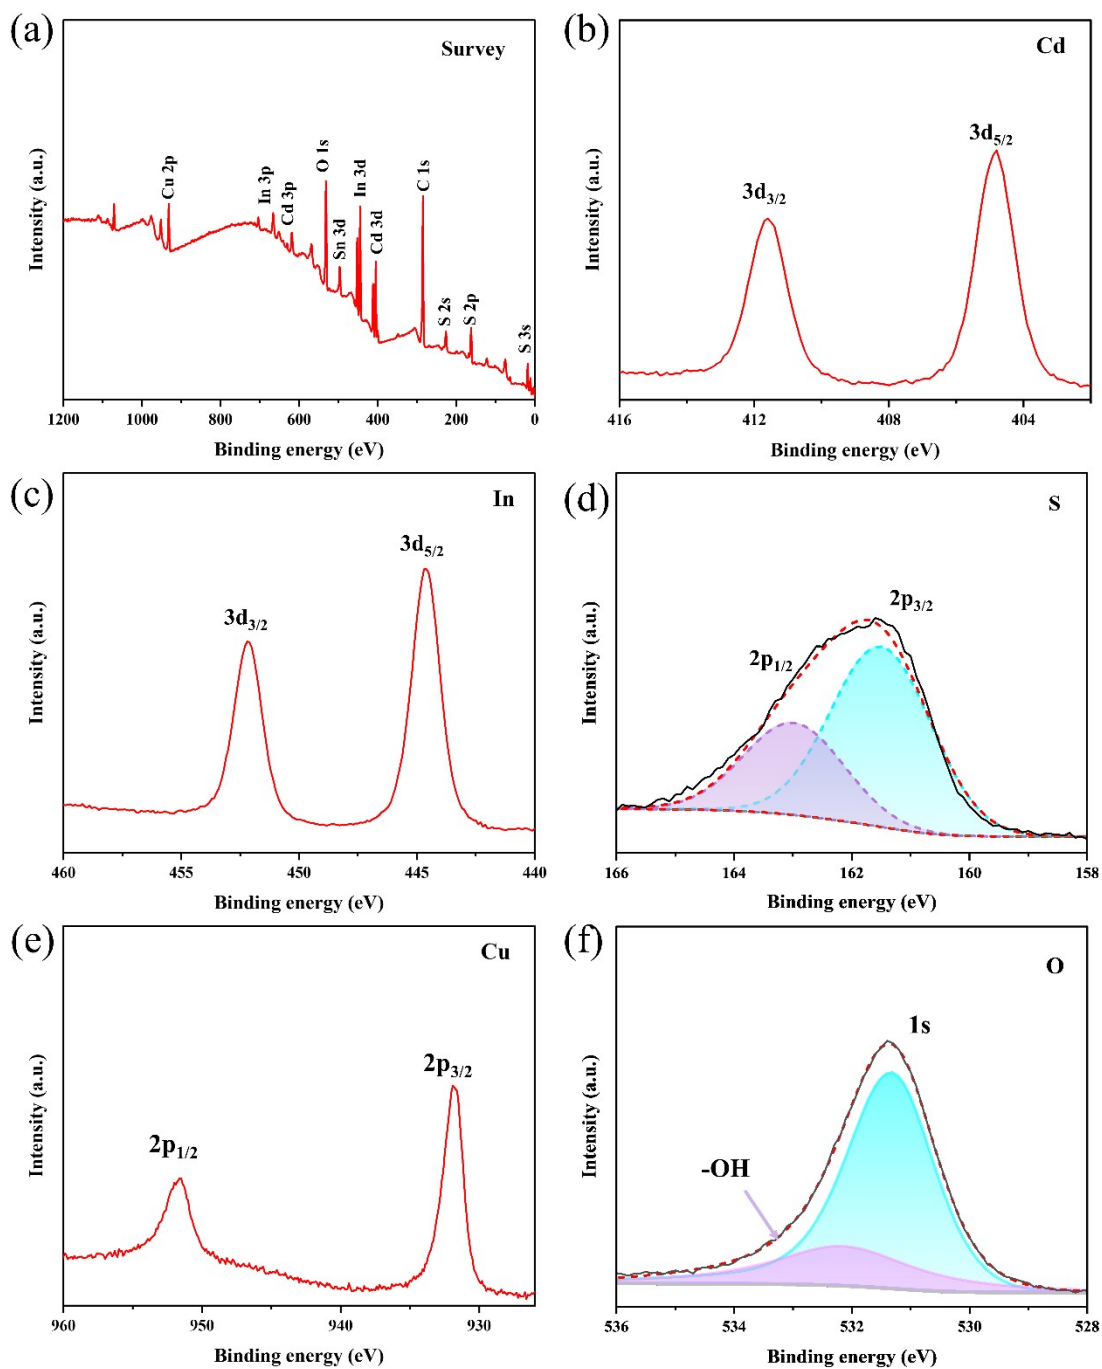

**Fig. S6.** (a) The XPS survey spectrum of CdIn<sub>2</sub>S<sub>4</sub>/Cu<sub>2</sub>O heterojunction, (b-f) high-resolution spectra of Cd, In, S, Cu and O elements after stability testing.

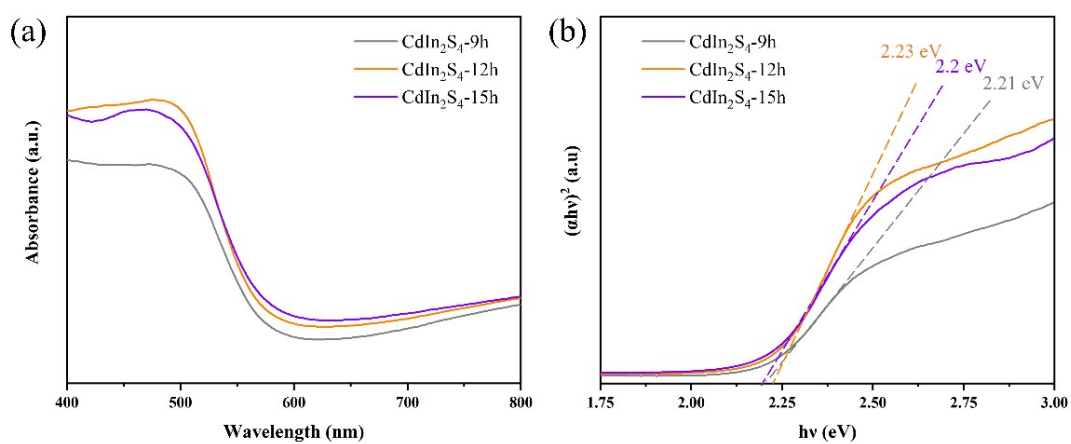

**Fig. S7.** (a) UV-vis diffuse reflectance spectroscopy and (b) corresponding Tauc plots for CdIn<sub>2</sub>S<sub>4</sub>.

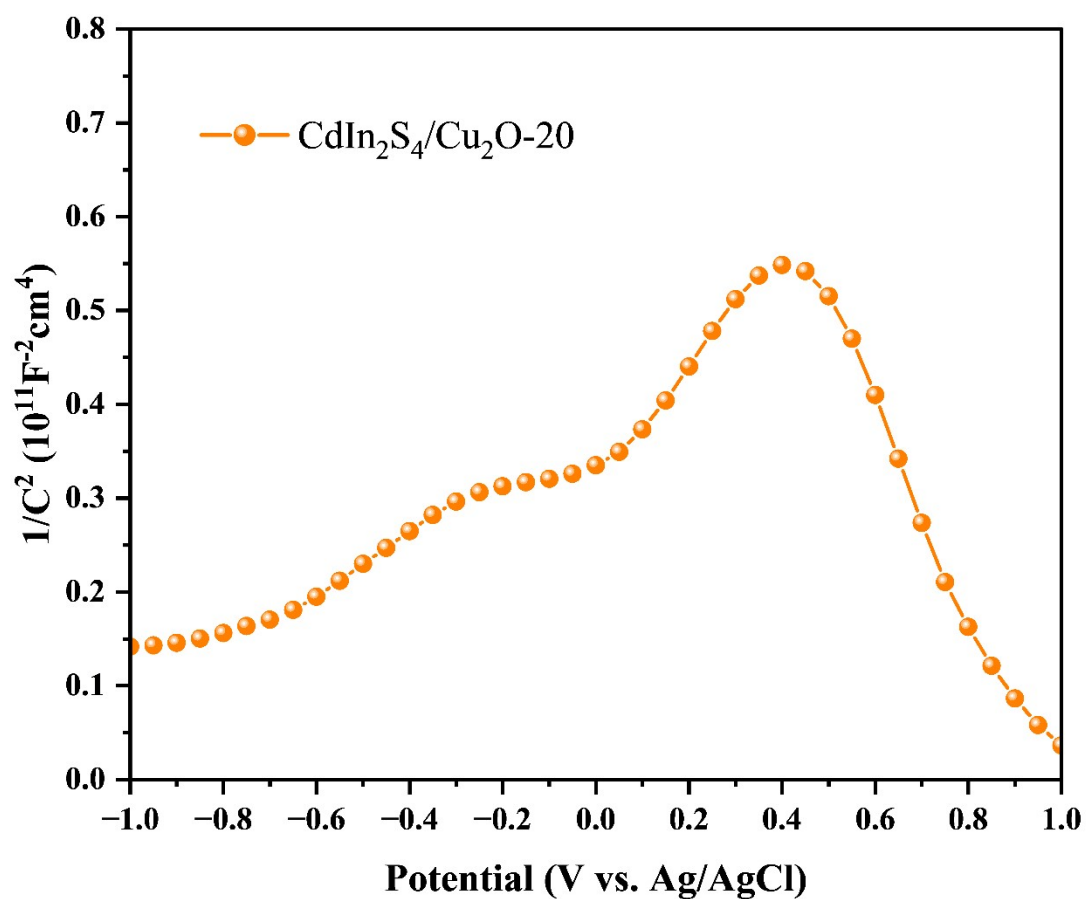

**Fig. S8.** The Mott-Schottky curve of the CdIn<sub>2</sub>S<sub>4</sub>/Cu<sub>2</sub>O photoanode.

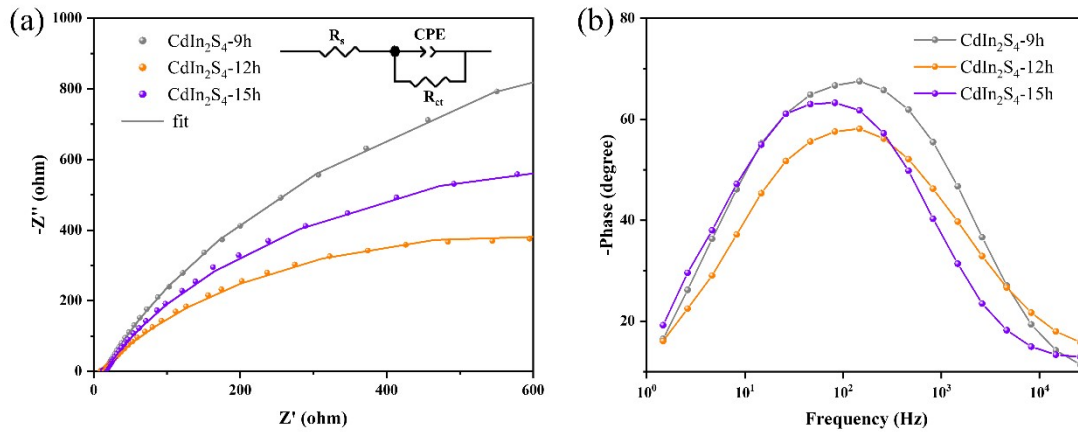

**Fig. S9.** EIS Nyquist plots with equivalent circuit fitting and (b) Bode plots of CdIn<sub>2</sub>S<sub>4</sub>.

**Table 1** The comparison of PEC performance of CdIn<sub>2</sub>S<sub>4</sub>/Cu<sub>2</sub>O photoanodes with other CdIn<sub>2</sub>S<sub>4</sub>-based photoanodes.

| Photoanodes                                                          | Photocurrent density<br>(bias)              | Light and<br>intensity             | Electrolyte                                                          | Ref.         |
|----------------------------------------------------------------------|---------------------------------------------|------------------------------------|----------------------------------------------------------------------|--------------|
| CdIn <sub>2</sub> S <sub>4</sub> /g-C <sub>3</sub> N <sub>4</sub>    | 0.35 mA/cm <sup>2</sup> (1.23 V vs.<br>RHE) | AM 1.5G 100<br>mW/cm <sup>2C</sup> | 0.1 M Na <sub>2</sub> SO <sub>4</sub>                                | 1            |
| CdIn <sub>2</sub> S <sub>4</sub> /In <sub>2</sub> S <sub>3</sub> -Sn | 2.98 mA/cm <sup>2</sup> (1.23 V vs.<br>RHE) | AM 1.5G 100<br>mW/cm <sup>2</sup>  | 0.5 M Na <sub>2</sub> SO <sub>4</sub>                                | 2            |
| CuS/CdIn <sub>2</sub> S <sub>4</sub>                                 | 28 μA/cm <sup>2</sup> (0 V vs.<br>Ag/AgCl)  | A 300 W<br>xenon lamp              | 0.5 M Na <sub>2</sub> SO <sub>4</sub>                                | 3            |
| TiO <sub>2</sub> /CdIn <sub>2</sub> S <sub>4</sub> /NiO              | 0.6 mA/cm <sup>2</sup> (1.23 V vs.<br>RHE)  | AM 1.5G 100<br>mW/cm <sup>2</sup>  | 0.5 M Na <sub>2</sub> SO <sub>4</sub>                                | 4            |
| NiOOH /F:CdIn <sub>2</sub> S <sub>4</sub>                            | 5.48 mA/cm <sup>2</sup> (1.23 V vs.<br>RHE) | AM 1.5G 100<br>mW/cm <sup>2</sup>  | 0.5 M Na <sub>2</sub> SO <sub>3</sub>                                | 5            |
| FeOOH/ CdIn <sub>2</sub> S <sub>4</sub> -W                           | 4.52 mA/cm <sup>2</sup> (1.23 V vs.<br>RHE) | AM 1.5G 100<br>mW/cm <sup>2</sup>  | 0.5 M Na <sub>2</sub> SO <sub>4</sub>                                | 6            |
| CuCo <sub>2</sub> S <sub>4</sub> /CdIn <sub>2</sub> S <sub>4</sub>   | 1.1 μA/cm <sup>2</sup> (1.23 V vs.<br>RHE)  | A 300W<br>xenon lamp               | 0.2 M Na <sub>2</sub> SO <sub>4</sub>                                | 7            |
| CdIn <sub>2</sub> S <sub>4</sub> /Cu <sub>2</sub> O                  | 6 mA/cm <sup>2</sup> (0 V vs.<br>Ag/AgCl)   | A 300W<br>xenon lamp (λ            | 0.35 M Na <sub>2</sub> S +<br>0.25 M Na <sub>2</sub> SO <sub>3</sub> | This<br>work |



## References

1. D. Liu, J. Liu, L. Wu, Z. Zhou, Z. Su, B. Yang and L. Feng, *New Journal of Chemistry*, 2024, **48**, 14624-14630. DOI: 10.1039/d4nj02717e.
2. L. Meng, M. Wang, H. Sun, W. Tian, C. Xiao, S. Wu, F. Cao and L. Li, *Adv Mater*, 2020, **32**, e2002893. DOI: 10.1002/adma.202002893
3. W. Hou, P. Xia, C. Zhuang, Q. Liu, T. Cheng, Y. Zheng, Y. Zhu, Y. Wei, H. Chi, Y. Zhou and Z. Zou, *Nanoscale*, 2024. DOI: 10.1039/d4nr03104k.
4. W. Xu, W. Tian, L. Meng, F. Cao and L. Li, *Advanced Materials Interfaces*, 2020, **7**, 1901947. DOI: 10.1002/admi.201901947.
5. J. Liu, Y. Zhang, S. Min, Y. Ren, C. Liu and Z. Chen, *International Journal of Hydrogen Energy*, 2024, **87**, 300-309. DOI: 10.1016/j.ijhydene.2024.08.481.
6. B. Shao, L. Meng, F. Chen, J. Wang, W. Zhai and L. Li, *Small*, 2024, **20**, e2401143. DOI: 10.1002/sml.202401143.
7. Y. Rao, M. Sun, B. Zhou, Z. Wang, T. Yan and Y. Shao, *ACS Applied Energy Materials*, 2024, **7**, 5457-5466. DOI: 10.1021/acsaem.4c00794.
